# Supplementary material
Source: PubMed Central journal article supplement (PMC8721872)
Supplement: NIHMS1767771-supplement-Supplementary_Material.pdf [file NIHMS1767771-supplement-Supplementary_Material.pdf]

Supplemental Data for “Mass Spectrometric Imaging of Ceramides Tracks Therapeutic Response in Traumatic Brain Injury” by Barbacci et al.

List of Supplementary Figures and Tables

Figure S1 8-bit grayscale mass images of CE18:1 (m/z 757.5052).

Figure S2 Binary images of CE18:1 (m/z 757.5052).

Figure S3 Box plot of total peak area for CE18:1 (m/z 757.5052) across sample groups and quadrants.

Figure S4 8-bit grayscale mass images of DAG 40:a6 (m/z 775.4430).

Figure S5 Binary images of DAG 40:a6 (m/z 775.4430).

Figure S6 Box plot of total peak area for DAG 40:a6 (m/z 775.4430) across sample groups and quadrants.

Figure S7. 8-bit grayscale mass images of CER 34:1.

Figure S8. 8-bit grayscale mass images of CER 38:1.

Figure S9. 8-bit grayscale mass images of CER 36:1.

Figure S10. 8-bit grayscale mass images of CER 36:2.

Figures S11. ECDF for CER 36:1 from all sample groups.

Table S1. The number of pixels greater than threshold and the Total Peak Area for pixels greater than threshold for each quadrant of each sample.

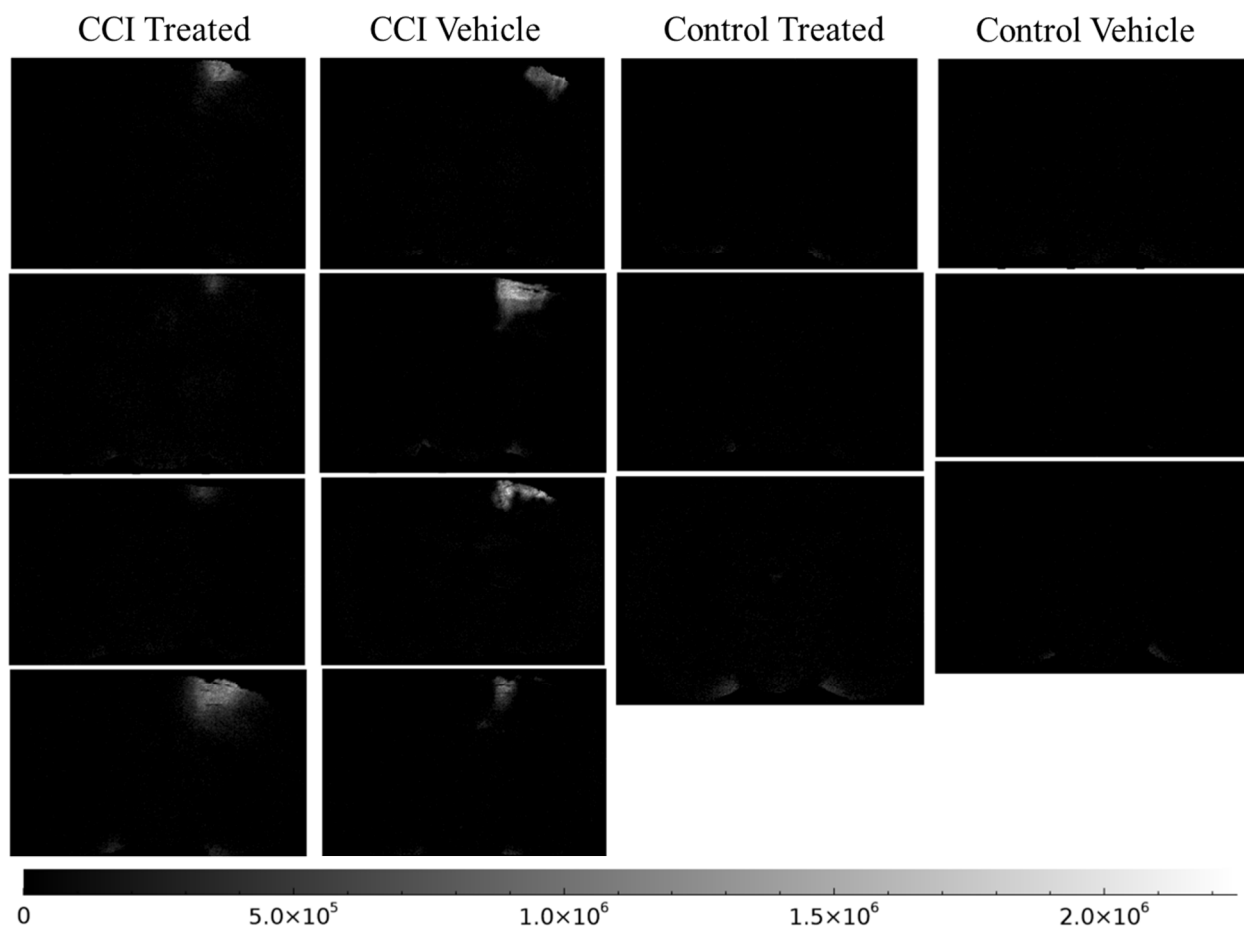

Figure S1. The distribution of CE18:1 (m/z 757.5052) displayed as 8-bit grayscale images for each study sample.

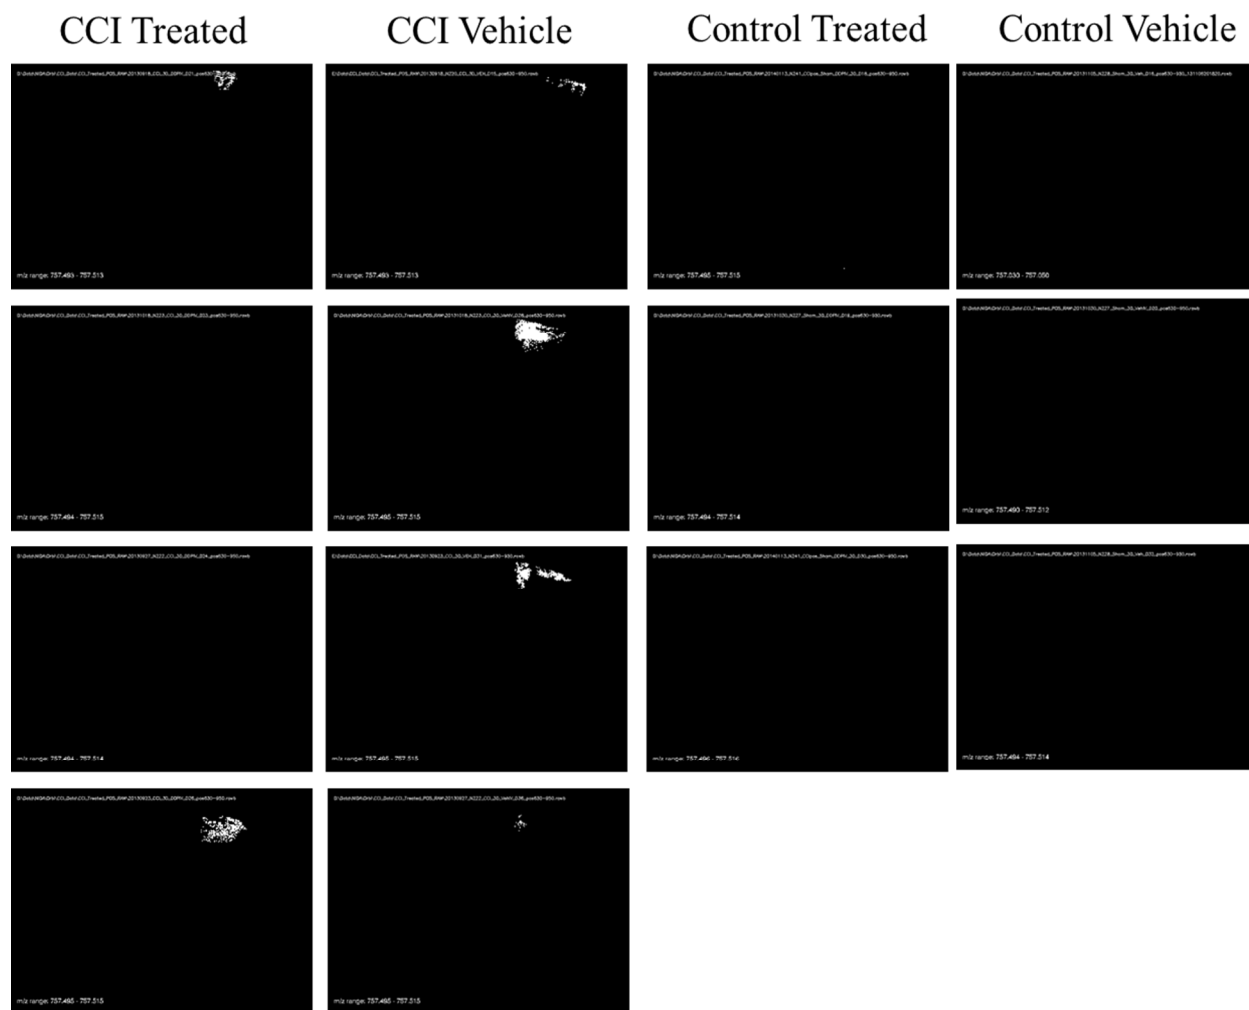

Figure S2. The distribution of CE 18:1 ( $m/z$  757.5052) displayed as binary images of pixels exceeding peak area threshold. Black pixels represent peak area less than or equal to 953000 counts and white pixels represent peak areas greater than 953000 counts.

### CE 18:1

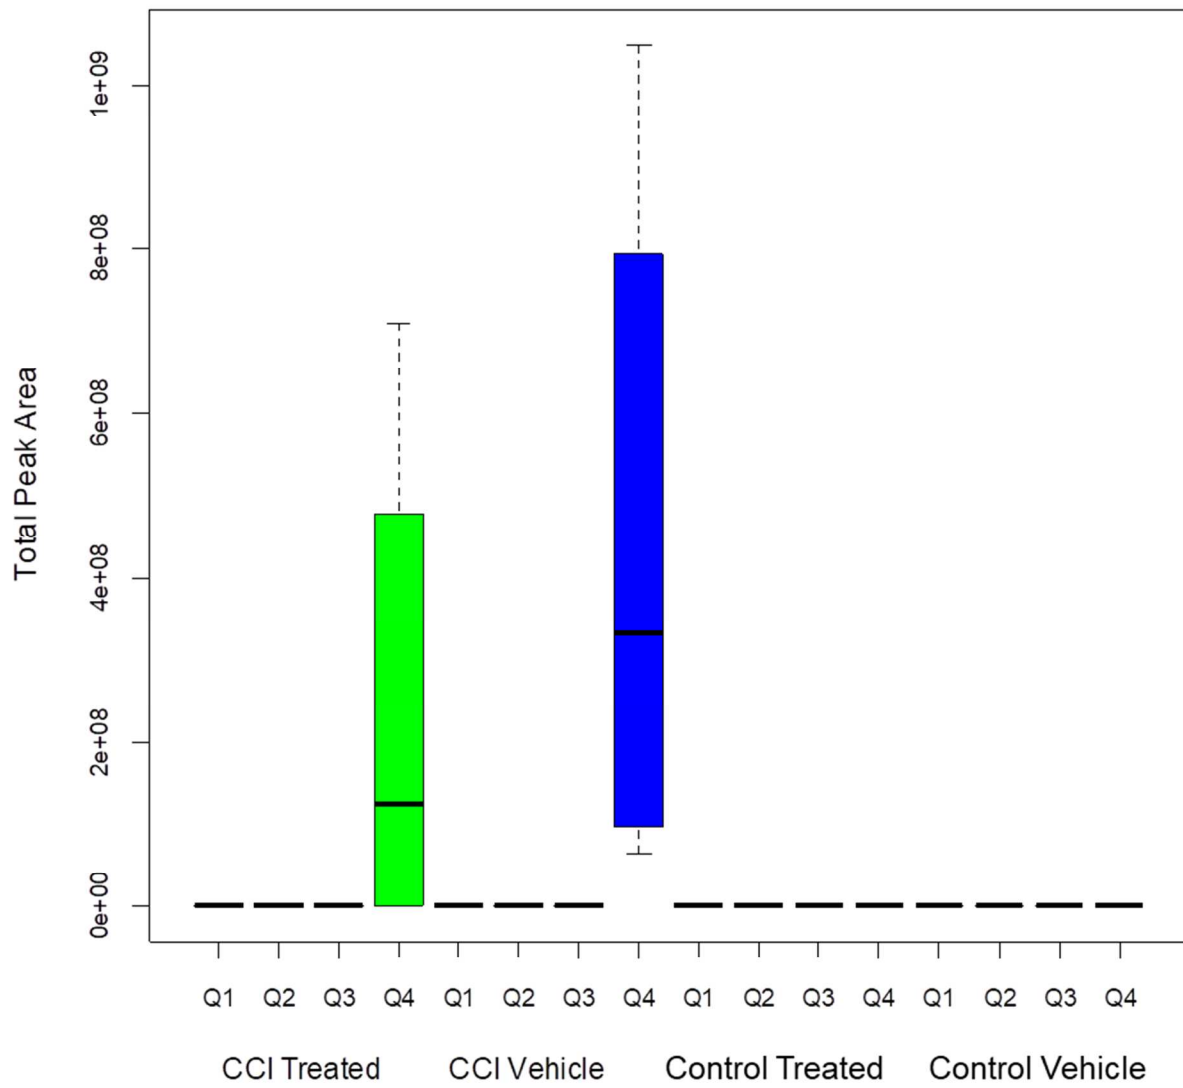

Figure S3. Total Peak Area for pixels greater than threshold for CE 18:1. CCI Vehicle and CCI Treated Q4 are significantly different than Q4 of Control Treated ( $p=0.037$ ) and Control Vehicle ( $p=0.037$ ) Arms. CCI Vehicle Q4 is not significantly different from CCI Treated Q4.

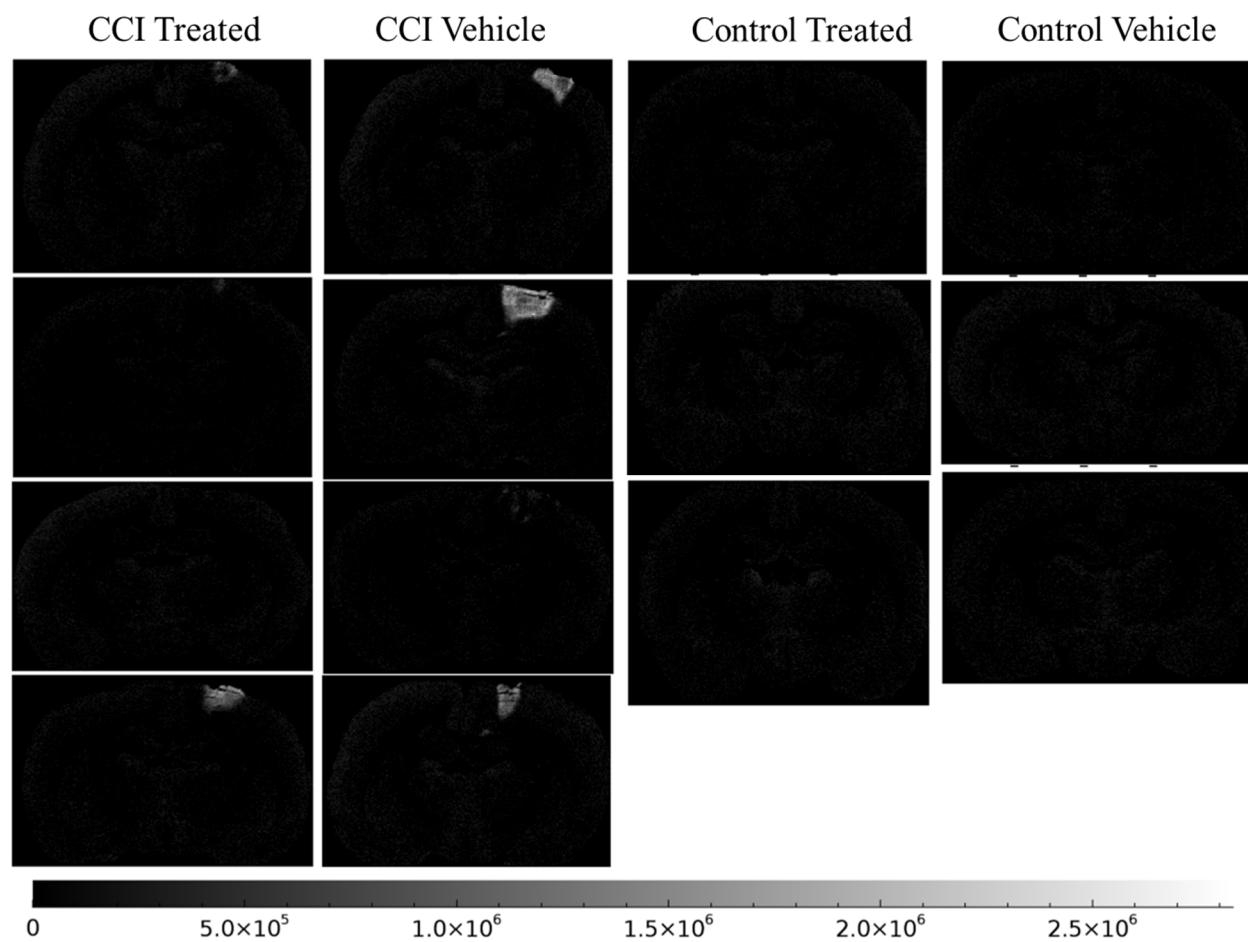

Figure S4. The distribution of DAG 40:a6 (m/z 775.4430) displayed as 8-bit grayscale images for each study sample.

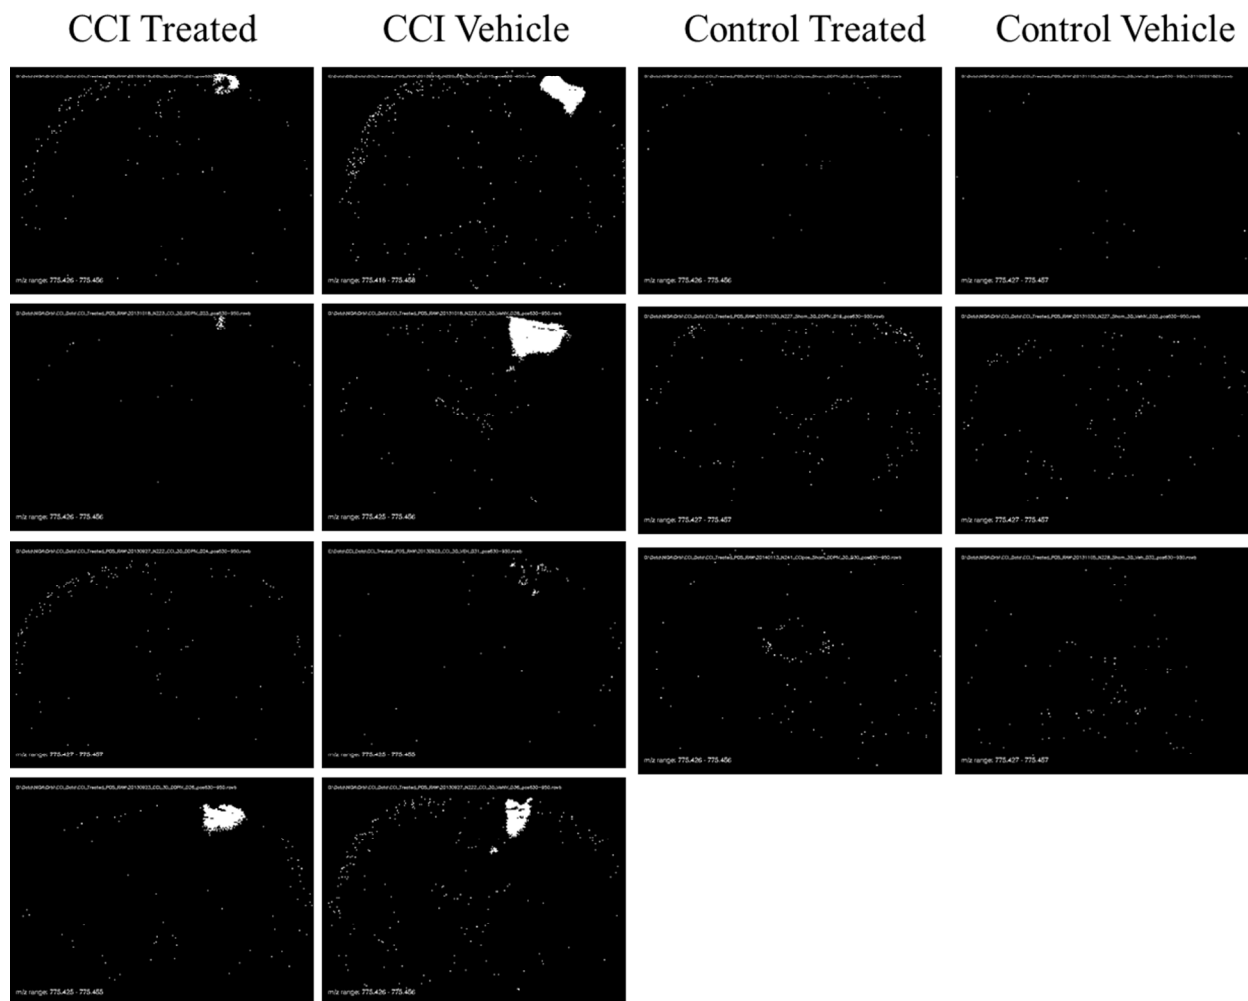

Figure S5. The distribution of DAG 40:a6 ( $m/z$  775.4430) displayed as binary images of pixels exceeding peak area threshold. Black pixels represent peak area less than or equal to 381000 counts and white pixels represent peak areas greater than 381000 counts.

### DAG 40:a6

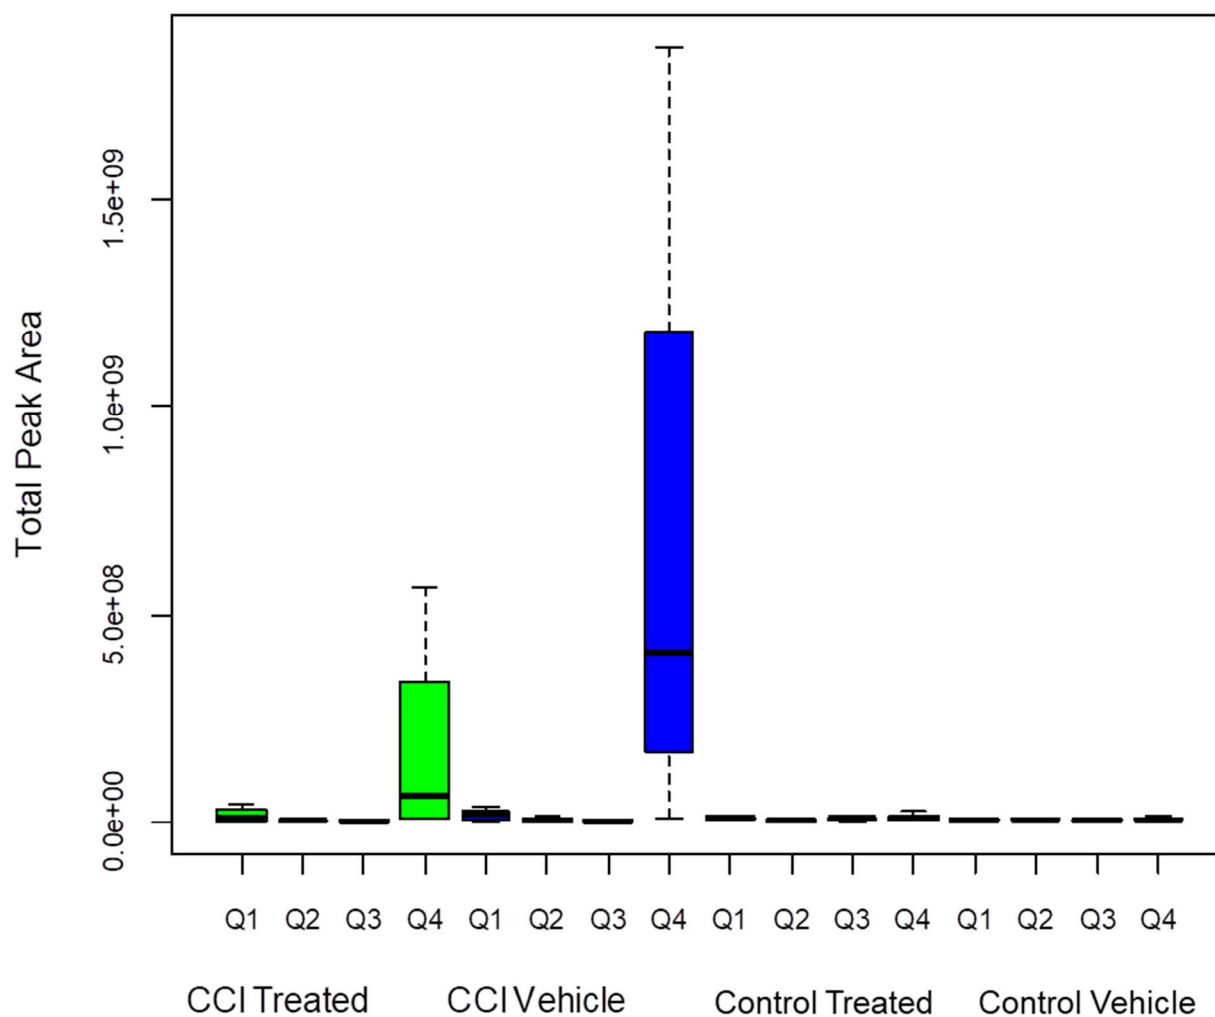

Figure S6. Total Peak Area for pixels greater than threshold for DAG 40:a6. CCI Vehicle and CCI Treated Q4 are significantly different than Q4 of Control Treated ( $p=0.048$ ) and Control Vehicle ( $p=0.044$ ) Arms. CCI Vehicle Q4 is not significantly different from CCI Treated Q4.

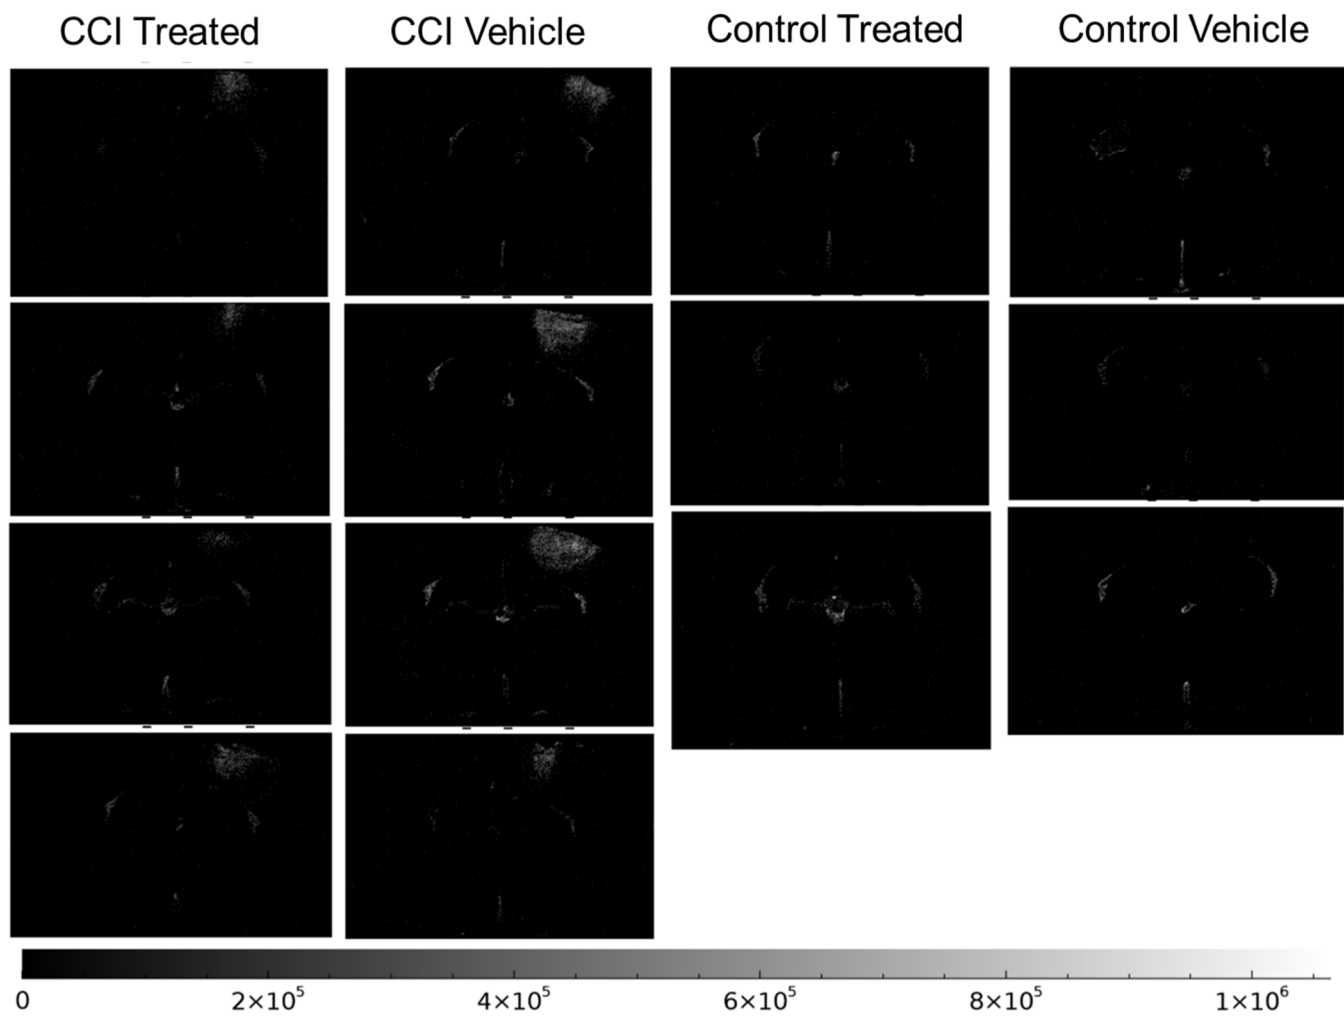

Figure S7. CER 34:1 ( $m/z$  644.4171) 8-bit grayscale mass images of with intensity scale.



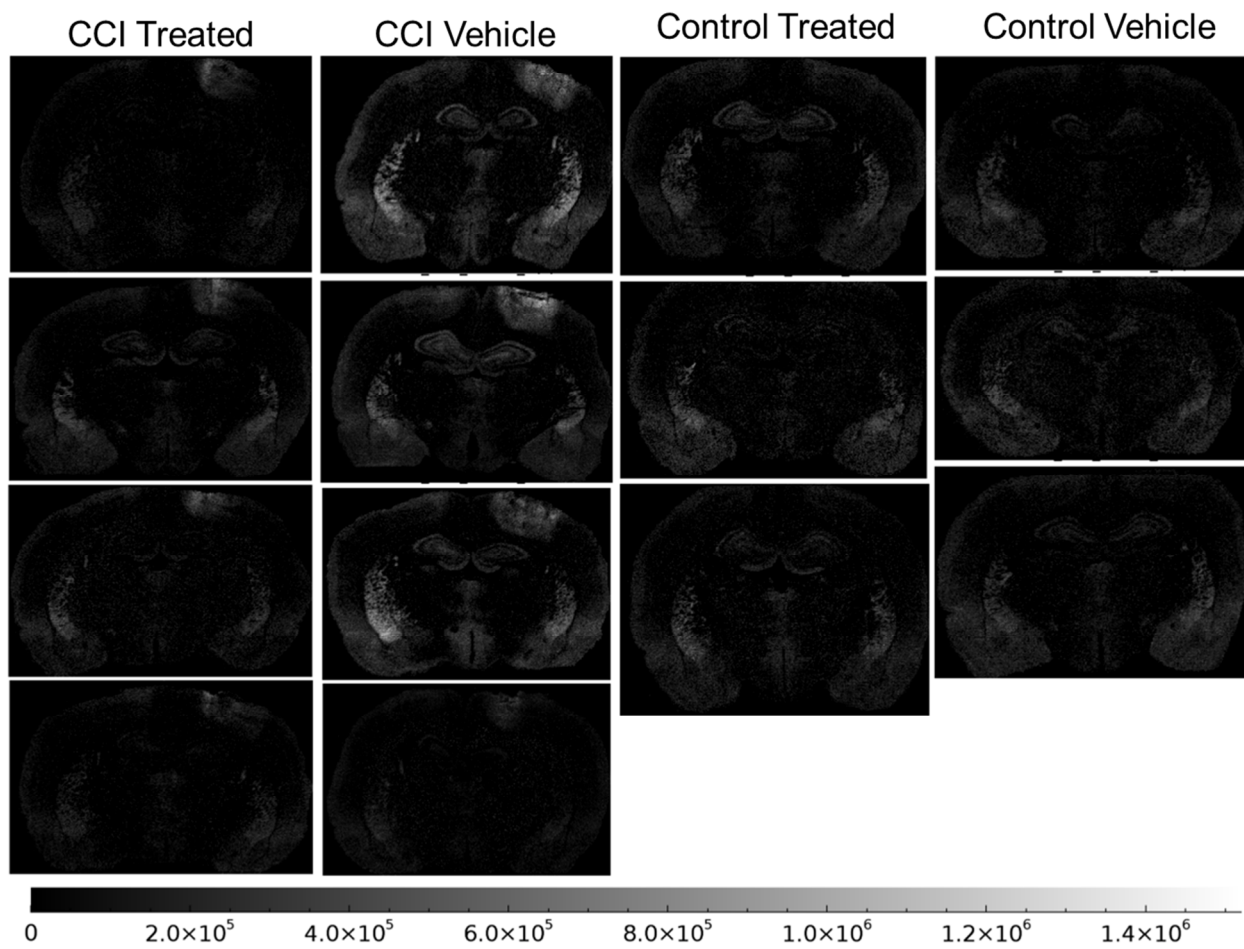

Figure S8. CER 36:2 (m/z 670.4328) 8-bit grayscale mass images of each sample with intensity scale.

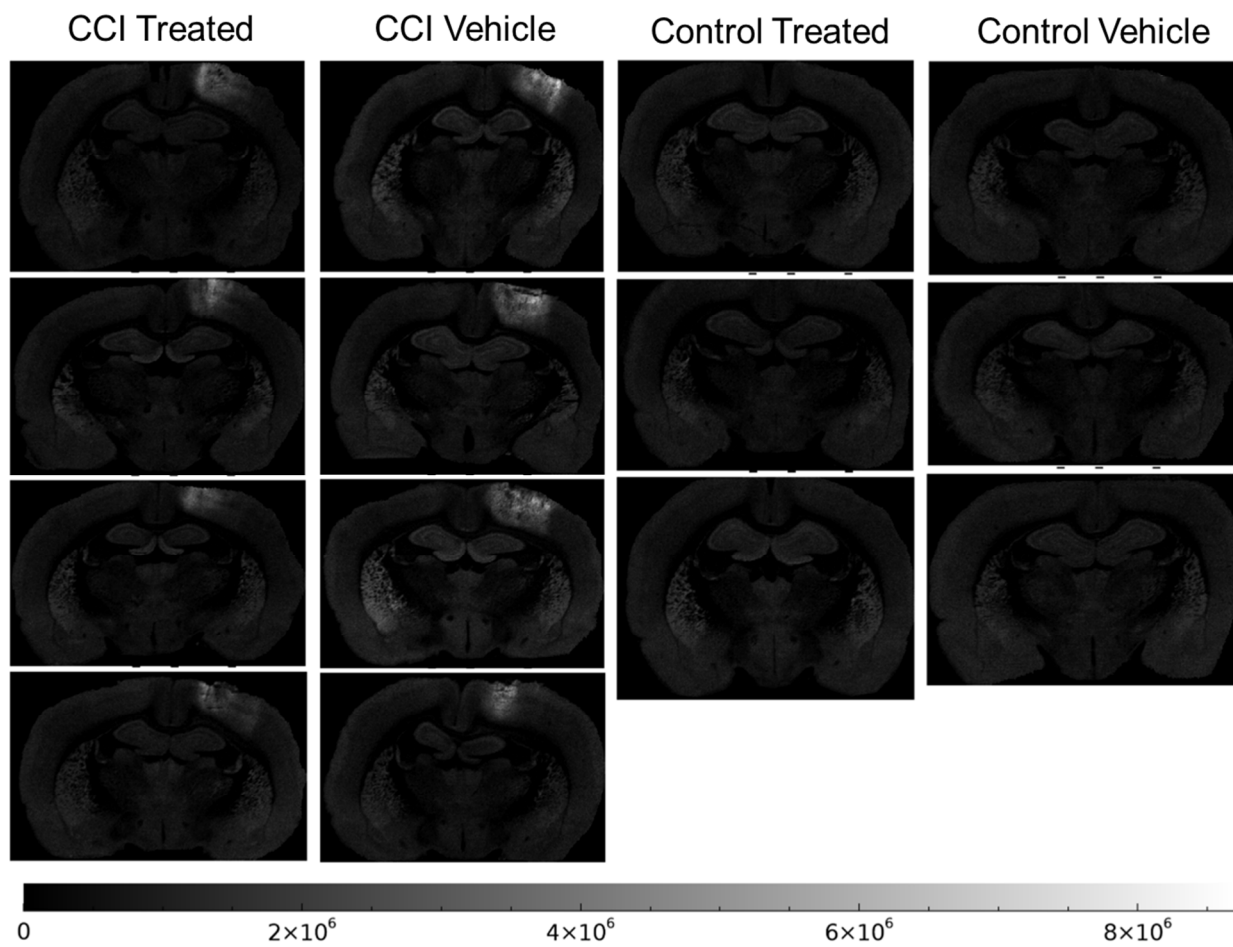

Figure S9. CER 36:1 (m/z 674.4481) 8-bit grayscale mass images of each sample with intensity scale.

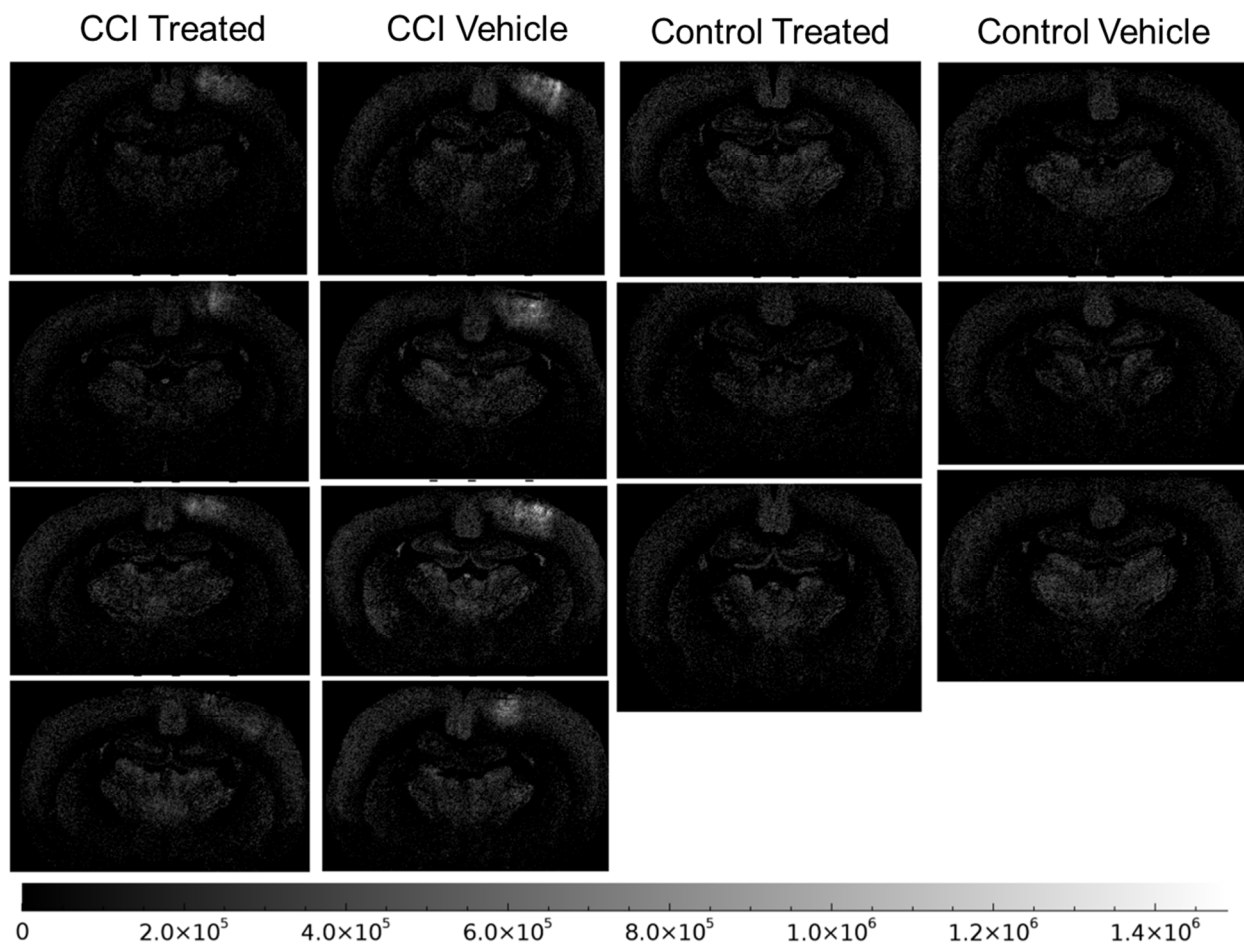

Figure S10. CER 38:1 (m/z 700.4797) 8-bit grayscale mass images of each sample with intensity scale.

CER 36:1

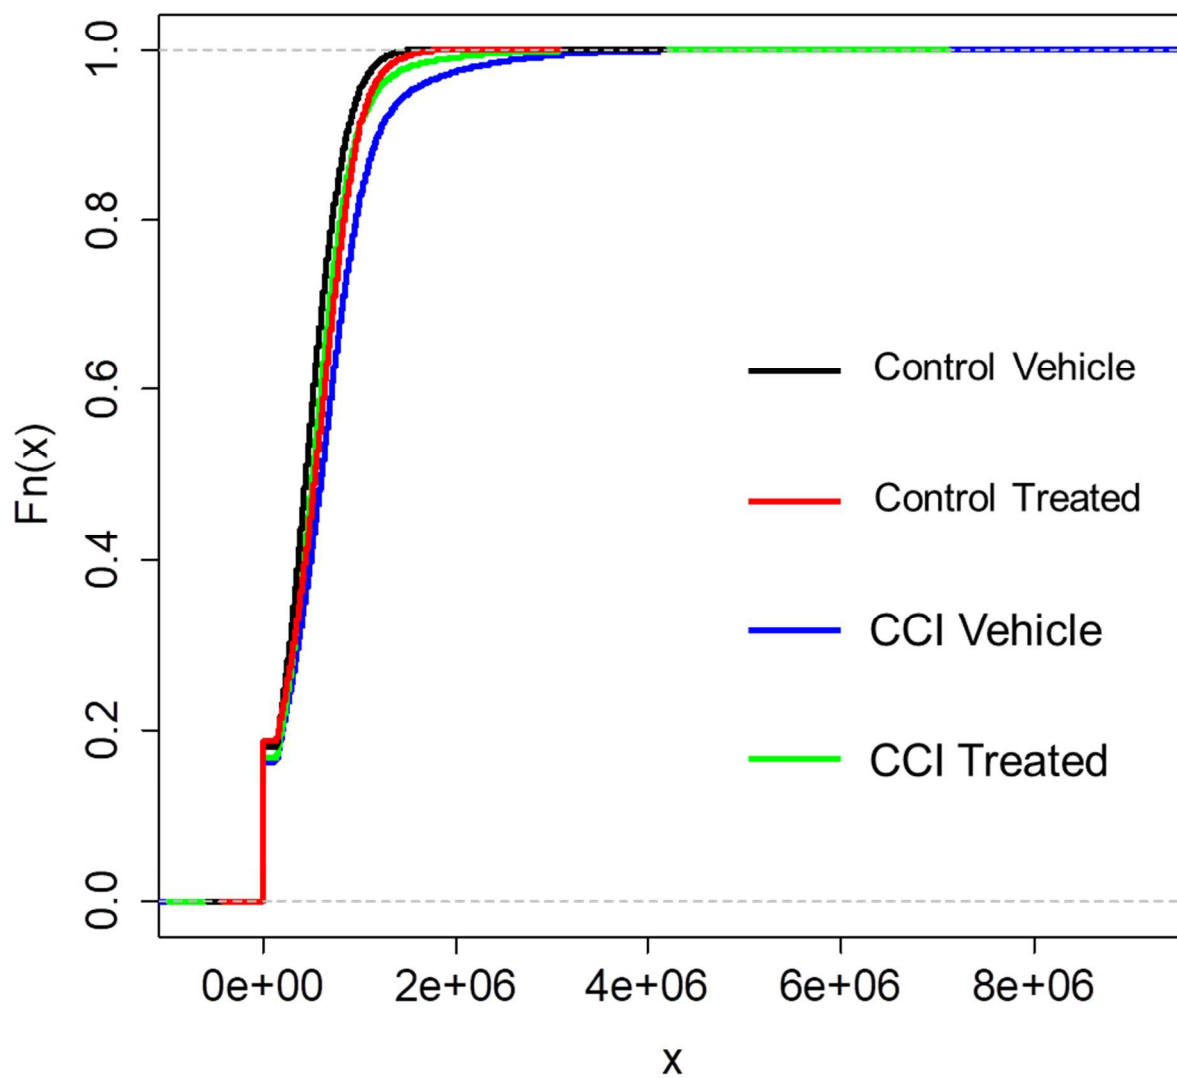

Figure S11. Overlay of empirical cumulative distribution functions for CER 36:1 (m/z 674.4481) for each sample group.

| Arm             | Quadrant        | # Pixel |         |         |         | Total Area |           |            |           |           |
|-----------------|-----------------|---------|---------|---------|---------|------------|-----------|------------|-----------|-----------|
|                 |                 | CER34:1 | CER36:2 | CER36:1 | CER38:1 | CER34:1    | CER36:2   | CER36:1    | CER38:1   |           |
| CCI Treated     | Q1              | 32      | 7       | 60      | 199     | 5840000    | 2983143   | 80280000   | 69333000  |           |
|                 |                 | 117     | 33      | 133     | 177     | 24801000   | 13820826  | 186390000  | 62003000  |           |
|                 |                 | 205     | 17      | 200     | 485     | 42956000   | 7098788   | 280830000  | 176040000 |           |
|                 |                 | 87      | 0       | 118     | 325     | 18594000   | 0         | 155760000  | 117515000 |           |
|                 | Q2              | 23      | 49      | 190     | 53      | 3527000    | 20233702  | 257140000  | 18300000  |           |
|                 |                 | 40      | 458     | 400     | 120     | 6908000    | 215529963 | 586880000  | 42990000  |           |
|                 |                 | 83      | 183     | 461     | 365     | 19576000   | 79587013  | 662780000  | 134436000 |           |
|                 |                 | 36      | 19      | 356     | 328     | 7037000    | 7732824   | 481210000  | 119617000 |           |
|                 | Q3              | 15      | 5       | 37      | 50      | 2386000    | 2116451   | 48950000   | 17258000  |           |
|                 |                 | 100     | 291     | 294     | 117     | 22687000   | 130971752 | 410950000  | 41528000  |           |
|                 |                 | 24      | 19      | 209     | 246     | 4200000    | 7876140   | 288210000  | 90911000  |           |
|                 |                 | 7       | 48      | 814     | 412     | 1075000    | 19882562  | 1116220000 | 153241000 |           |
|                 | Q4              | 571     | 397     | 1481    | 613     | 125406000  | 200606999 | 3062610000 | 245029000 |           |
|                 |                 | 471     | 560     | 1461    | 571     | 102036000  | 303951204 | 2879240000 | 233205000 |           |
|                 |                 | 318     | 181     | 1091    | 914     | 64920000   | 81436873  | 2162890000 | 377827000 |           |
|                 |                 | 634     | 55      | 1170    | 615     | 136137000  | 24928093  | 1988520000 | 228207000 |           |
| CCI Vehicle     | Q1              | 84      | 447     | 900     | 471     | 19288000   | 218820158 | 1324080000 | 169470000 |           |
|                 |                 | 166     | 320     | 397     | 472     | 44034000   | 141219513 | 546740000  | 172838000 |           |
|                 |                 | 238     | 137     | 877     | 656     | 61517000   | 61566162  | 1339880000 | 242886000 |           |
|                 |                 | 64      | 18      | 247     | 655     | 12514000   | 7444390   | 331580000  | 239645000 |           |
|                 | Q2              | 68      | 992     | 626     | 103     | 13666000   | 517709160 | 969260000  | 36770000  |           |
|                 |                 | 59      | 1539    | 796     | 319     | 10591000   | 783294030 | 1170380000 | 117832000 |           |
|                 |                 | 57      | 1279    | 2475    | 556     | 10185000   | 699951379 | 4331440000 | 206169000 |           |
|                 |                 | 28      | 154     | 406     | 316     | 4814000    | 65928498  | 554030000  | 116006000 |           |
|                 | Q3              | 17      | 804     | 645     | 45      | 2859000    | 428361620 | 999370000  | 16017000  |           |
|                 |                 | 53      | 1031    | 421     | 292     | 9642000    | 515585830 | 601660000  | 106795000 |           |
|                 |                 | 90      | 669     | 1647    | 492     | 17325000   | 307858415 | 2424880000 | 184053000 |           |
|                 |                 | 57      | 26      | 186     | 387     | 10623000   | 10347725  | 250240000  | 148546000 |           |
|                 | Q4              | 739     | 1113    | 2083    | 1227    | 184257000  | 608375925 | 5002110000 | 582061000 |           |
|                 |                 | 1542    | 1282    | 2404    | 1487    | 399213000  | 684099473 | 5384290000 | 656659000 |           |
|                 |                 | 1754    | 471     | 2802    | 1850    | 449232000  | 214116951 | 5868060000 | 867615000 |           |
|                 |                 | 510     | 344     | 1632    | 1242    | 113302000  | 161485037 | 3273510000 | 523072000 |           |
| Control Treated | Q1              | 81      | 124     | 381     | 589     | 20293000   | 54303574  | 537510000  | 214258000 |           |
|                 |                 | 64      | 13      | 78      | 199     | 12356000   | 6168149   | 113390000  | 70323000  |           |
|                 |                 | 314     | 20      | 295     | 445     | 73252000   | 8225361   | 411590000  | 163259000 |           |
|                 | Q2              | 65      | 99      | 283     | 218     | 13724000   | 42582691  | 396010000  | 80266000  |           |
|                 |                 | 15      | 75      | 247     | 97      | 2443000    | 31340398  | 338050000  | 33799000  |           |
|                 |                 | 21      | 341     | 924     | 221     | 3824000    | 155773326 | 1384580000 | 79827000  |           |
|                 | Q3              | 12      | 138     | 442     | 353     | 1873000    | 58998013  | 606700000  | 133692000 |           |
|                 |                 | 30      | 27      | 213     | 107     | 5935000    | 10823610  | 288690000  | 38469000  |           |
|                 |                 | 79      | 284     | 896     | 248     | 16388000   | 125682336 | 1307370000 | 91117000  |           |
|                 | Q4              | 116     | 37      | 279     | 750     | 27915000   | 15966925  | 380340000  | 276284000 |           |
|                 |                 | 76      | 0       | 37      | 278     | 15244000   | 0         | 49370000   | 97760000  |           |
|                 |                 | 208     | 20      | 291     | 439     | 45786000   | 7809978   | 407740000  | 161072000 |           |
|                 | Control Vehicle | Q1      | 111     | 10      | 73      | 297        | 23464000  | 3954762    | 101820000 | 107110000 |
|                 |                 |         | 67      | 4       | 94      | 315        | 13540000  | 1622618    | 127330000 | 112990000 |
|                 |                 |         | 120     | 3       | 149     | 421        | 34253000  | 1160692    | 196970000 | 152045000 |
|                 |                 | Q2      | 44      | 111     | 382     | 268        | 8375000   | 48028566   | 535000000 | 97981000  |
| 35              |                 |         | 87      | 365     | 102     | 7569000    | 37125466  | 498440000  | 36327000  |           |
| 59              |                 |         | 166     | 755     | 416     | 15231000   | 69813512  | 1028220000 | 158011000 |           |
| Q3              |                 | 105     | 56      | 180     | 269     | 26239000   | 23320126  | 244180000  | 98604000  |           |
|                 |                 | 25      | 28      | 168     | 110     | 4173000    | 11539144  | 223050000  | 41075000  |           |
|                 |                 | 37      | 222     | 748     | 303     | 6924000    | 94432847  | 1038760000 | 115776000 |           |
| Q4              |                 | 107     | 3       | 55      | 322     | 23132000   | 1200731   | 76700000   | 114928000 |           |
|                 |                 | 41      | 5       | 74      | 335     | 7847000    | 1980391   | 100190000  | 120937000 |           |
|                 |                 | 112     | 11      | 118     | 402     | 27657000   | 4756766   | 162370000  | 145999000 |           |

Table S1 Number of Pixels and Area Counts per Quadrant per Arm for each CER.
